# Supplementary material
Source: publisher site journal article supplement (https://www.dovepress.com/article/437076)
Supplement: Supplementary file 1 [file get_supplementary_file.php]

Appendix A Models fit and quality indices.

| Egypt Model fit indices | Saudi Model fit indices |
| --- | --- |
| Average path coefficient (APC)=0.357, P<0.001 | Average path coefficient (APC)=0.352, P<0.001 |
| Average R-squared (ARS)=0.589, P<0.001 | Average R-squared (ARS)=0.568, P<0.001 |
| Average adjusted R-squared (AARS)=0.587, P<0.001 | Average adjusted R-squared (AARS)=0.565, P<0.001 |
| Average block VIF (AVIF)=2.511, acceptable if <= 5, ideally <= 3.3 | Average block VIF (AVIF)=2.452, acceptable if <= 5, ideally <= 3.3 |
| Average full collinearity VIF (AFVIF)=3.110, acceptable if <= 5, ideally <= 3.3 | Average full collinearity VIF (AFVIF)=2.981, acceptable if <= 5, ideally <= 3.3 |
| Tenenhaus GoF (GoF)=0.620, small >= 0.1, medium >= 0.25, large >= 0.36 | Tenenhaus GoF (GoF)=0.599, small >= 0.1, medium >= 0.25, large >= 0.36 |
| Sympson's paradox ratio (SPR)=1.000, acceptable if >= 0.7, ideally = 1 | Sympson's paradox ratio (SPR)=1.000, acceptable if >= 0.7, ideally = 1 |
| R-squared contribution ratio (RSCR)=1.000, acceptable if >= 0.9, ideally = 1 | R-squared contribution ratio (RSCR)=1.000, acceptable if >= 0.9, ideally = 1 |
| Statistical suppression ratio (SSR)=1.000, acceptable if >= 0.7 | Statistical suppression ratio (SSR)=1.000, acceptable if >= 0.7 |
| Nonlinear bivariate causality direction ratio (NLBCDR)=1.000, acceptable if >= 0.7 | Nonlinear bivariate causality direction ratio (NLBCDR)=1.000, acceptable if >= 0.7 |
